# Supplementary material for: Inferring Latent Disease-lncRNA Associations by Faster Matrix Completion on a Heterogeneous Network
Source: Front Genet. 2019 Sep 4;10:769. doi: 10.3389/fgene.2019.00769 (PMC6749816; doi:10.3389/fgene.2019.00769)
Supplement: Supplementary file 6 [file Table_6.docx]

Supplementary Material

**Inferring Latent Disease-lncRNA Associations by Faster Matrix**

**Completion on a Heterogeneous Network**

**WenLi1, Shulin Wang1*, Junlin Xu1, Guo Mao1, Geng Tian2, Jialiang Yang 2***

1 College of Information Science and Engineering, Hunan University, Changsha, Hunan, 410082, P.R. China

2 Geneis Beijing Co., Ltd., Beijing, 100102, China

*** Correspondence:**

Shulin Wang: smartforesting@163.com

Jialiang Yang: yangjl@geneis.cn

Supplementary Algorithm

| Algorithm 1 : FRMCLDA algorithm using faster SVT |
| --- |
| **Input:** lncRNAs similarity matrix *LS*, disease similarity matrix *DS* and incomplete lncRNA-disease association matrix *LD.* Sampling set *Φ*, step size *δ* , the error limit *ε* , Singular value threshold *τ* , increment *l*, max iteration number *i*max.  **Output:** Completed lncRNA-disease association matrix *LD**   1. *Calculate lncRNA integrate similarity LS and disease integrate similarity matrix DS based on the association matrix LD.* 2. *Construct a large sparse adjacent matrix A for heterogeneous network.* 3. Initiation: , , *r0 = 0*, *q = 0*, *p = 2*, *l*=5, *imax*=1000. 4. **for** *i = 1,2, · · ·, imax* **do** 5. *ki = ri-1 + l, then regulate the value of p dynamically* 6. **repeat** 7. **if** *i < ireuse* ***or*** *q == qreuse* ***then*** 9. *q = 0* 10. ***else*** 11. *reuse Q in last round execution of rSVD-BKIr algorithm, and then compute , ,* 12. *q = q + 1;* 13. ***end if*** 15. ***until*** 17. */*linearized Bregmans interations*/* 18. ***if*** ***then break*** 20. ***end for*** 22. ***Return*** *LD** |

%% where the rSVD-BKI is referenced from the literature: “Faster Matrix Completion Using Randomized SVD”
